# Supplementary material for: Water vapor effect on the physico-geometrical reaction pathway and kinetics of the multistep thermal dehydration of calcium chloride dihydrate
Source: Royal Society of Chemistry journal article supplement (doi:10.1039/d4cp01870b), 2024-01-01
Supplement: d4cp01870b1.pdf [file d4cp01870b1.pdf]

# Water vapor effect on the physico-geometrical reaction pathway and kinetics of the multistep thermal dehydration of calcium chloride dihydrate

Kazuki Kato, Mito Hotta, and Nobuyoshi Koga\*

Department of Science Education, Division of Educational Sciences, Graduate School of Humanities and Social Sciences, Hiroshima University, 1-1-1 Kagamiyama, Higashi-Hiroshima 739-8524, Japan

## Contents

|                                                                                                                                                                                                                                                                                                                                                                                                                                                                                                 |     |
|-------------------------------------------------------------------------------------------------------------------------------------------------------------------------------------------------------------------------------------------------------------------------------------------------------------------------------------------------------------------------------------------------------------------------------------------------------------------------------------------------|-----|
| S1. Water vapor effect on the reaction pathway.....                                                                                                                                                                                                                                                                                                                                                                                                                                             | s3  |
| Weibull function .....                                                                                                                                                                                                                                                                                                                                                                                                                                                                          | s3  |
| <b>Figure S1.</b> MDA results for the thermal dehydration process of CC-DH ( $m_0 = 3.01 \pm 0.04$ mg) to form CC-AH under linear nonisothermal conditions at various $\beta$ values in a stream of wet N <sub>2</sub> with $p(\text{H}_2\text{O}) = 0.8$ kPa. ....                                                                                                                                                                                                                             | s3  |
| <b>Figure S2.</b> MDA results for the thermal dehydration process of CC-DH ( $m_0 = 3.02 \pm 0.06$ mg) to form CC-AH under linear nonisothermal conditions at various $\beta$ values in a stream of wet N <sub>2</sub> with $p(\text{H}_2\text{O}) = 1.8$ kPa. ....                                                                                                                                                                                                                             | s4  |
| <b>Figure S3.</b> MDA results for the thermal dehydration process of CC-DH ( $m_0 = 3.03 \pm 0.05$ mg) to form CC-AH under linear nonisothermal conditions at various $\beta$ values in a stream of wet N <sub>2</sub> with $p(\text{H}_2\text{O}) = 4.2$ kPa. ....                                                                                                                                                                                                                             | s5  |
| <b>Figure S4.</b> MDA results for the thermal dehydration process of CC-DH ( $m_0 = 3.02 \pm 0.04$ mg) to form CC-AH under linear nonisothermal conditions at various $\beta$ values in a stream of wet N <sub>2</sub> with $p(\text{H}_2\text{O}) = 7.5$ kPa. ....                                                                                                                                                                                                                             | s6  |
| <b>Figure S5.</b> TG curves for hydration process of CC-AH under linear cooling at $1 \text{ K min}^{-1}$ in a stream of wet N <sub>2</sub> ( $q_v = 200 \text{ cm}^3 \text{ min}^{-1}$ ): (a) typical measurement scheme for the rehydration process and (b) TG curves at various $p(\text{H}_2\text{O})$ values. ....                                                                                                                                                                         | s7  |
| S2. Kinetics of the component reaction steps at different $p(\text{H}_2\text{O})$ values.....                                                                                                                                                                                                                                                                                                                                                                                                   | s7  |
| <b>Figure S6.</b> An example of TG–DTG measurement conducted for the two-step thermal dehydration process of CC-DH to form CC-AH via CC-MH recorded by heating the sample ( $m_0 = 3.084$ mg) according to two-step isothermal heating program in a stream of wet N <sub>2</sub> with $p(\text{H}_2\text{O}) = 1.8$ kPa. ....                                                                                                                                                                   | s7  |
| <b>Figure S7.</b> Kinetic curves for the first reaction step of the two-step thermal dehydration of CC-DH to form CC-AH via CC-MH (thermal dehydration of CC-DH to form CC-MH) under linear nonisothermal conditions at various $\beta$ values in a stream of wet N <sub>2</sub> with different $p(\text{H}_2\text{O})$ values, extracted from the overall two-step thermal dehydration process of CC-DH to form CC-AH via CC-MH using MDA: (a) 0.8, (b) 1.8, (c) 4.2, and (d) 7.5 kPa. ....    | s8  |
| <b>Figure S8.</b> Kinetic curves for the second reaction step of the two-step thermal dehydration of CC-DH to form CC-AH via CC-MH (thermal dehydration of CC-MH to form CC-AH) under linear nonisothermal conditions at different $\beta$ values in a stream of wet N <sub>2</sub> with different $p(\text{H}_2\text{O})$ values, extracted from the overall two-step thermal dehydration process of CC-DH to form CC-AH via CC-MH using MDA: (a) 0.8, (b) 1.8, (c) 4.2, and (d) 7.5 kPa. .... | s8  |
| <b>Figure S9.</b> Kinetic curves for the first reaction step of the two-step thermal dehydration process of CC-DH to form CC-AH via CC-MH (thermal dehydration of CC-DH to form CC-MH) under isothermal and linear nonisothermal conditions at various $p(\text{H}_2\text{O})$ values, represented in the 3D kinetic coordinate of $T^{-1}$ , $\alpha$ , and $\ln(da/dt)$ : (a) 0.8, (b) 1.8, (c) 4.2, and (d) 7.5 kPa. ....                                                                    | s9  |
| <b>Figure S10.</b> Kinetic curves for the second reaction step of the two-step thermal dehydration process of CC-DH to form CC-AH via CC-MH (thermal dehydration of CC-MH to form CC-AH) under isothermal and linear nonisothermal conditions at various $p(\text{H}_2\text{O})$ values, represented in the 3D kinetic coordinate of $T^{-1}$ , $\alpha$ , and $\ln(da/dt)$ : (a) 0.8, (b) 1.8, (c) 4.2, and (d) 7.5 kPa. ....                                                                  | s9  |
| <b>Figure S11.</b> Friedman plots at different $\alpha_1$ for the first reaction step of the two-step thermal dehydration process of CC-DH to form CC-AH via CC-MH (thermal dehydration of CC-DH to form CC-MH) at various $p(\text{H}_2\text{O})$ values: (a) 0.8, (b) 1.8, (c) 4.2, and (d) 7.5 kPa. ....                                                                                                                                                                                     | s10 |
| <b>Figure S12.</b> Friedman plots at different $\alpha_2$ for the second reaction step of the two-step thermal dehydration of CC-DH to form CC-AH via CC-MH (thermal dehydration of CC-MH to form CC-AH) at various $p(\text{H}_2\text{O})$ values: (a) 0.8, (b) 1.8, (c) 4.2, and (d) 7.5 kPa. ....                                                                                                                                                                                            | s10 |

\* Corresponding author. E-mail: nkoga@hiroshima-u.ac.jp

**Figure S13.** Apparent linear correlations observed between  $\ln A_i$  and  $E_{a,i}$  values established for the first and second reaction steps of the thermal dehydration process of CC-DH to form CC-AH via CC-MH using the conventional Friedman plot and master plot methods..... s11

S3. Kinetic modeling based on IP–SR–PBR( $n$ ) models..... s11

**Table S1.** Differential kinetic equations of IP–SR–PBR( $n$ ) models ..... s11

**Figure S14.** Typical fitting results using SR–PBR(2) model for the first reaction step of the two-step thermal dehydration process of CC-DH to form CC-AH via CC-MH (thermal dehydration of CC-DH to form CC-MH) under isothermal conditions at various  $p(\text{H}_2\text{O})$  values: (a) 0.8, (b) 1.8, (c) 4.2, and (d) 7.5 kPa..... s12

**Figure S15.** Typical fitting results using IP–SR–PBR(2) model for the second reaction step of the two-step thermal dehydration process of CC-DH to form CC-AH via CC-MH (thermal dehydration of CC-MH to form CC-AH) under isothermal conditions at various  $p(\text{H}_2\text{O})$  values: (a) 0.8, (b) 1.8, (c) 4.2, and (d) 7.5 kPa..... s12

**Table S2.** Optimized rate constants of the SR–PBR( $n$ ) models for the first reaction step of the two-step thermal dehydration process of CC-DH to form CC-AH via CC-MH (thermal dehydration of CC-DH to form CC-MH) at various temperatures and  $p(\text{H}_2\text{O})$  values ..... s13

**Table S3.** Optimized rate constants of the IP–SR–PBR( $n$ ) models for the second reaction step of the two-step thermal dehydration process of CC-DH to form CC-AH via CC-MH (thermal dehydration of CC-MH to form CC-AH) at various temperatures and  $p(\text{H}_2\text{O})$  values..... s14

**Figure S16.** Arrhenius plots of the individual physico-geometrical reaction steps for the first reaction step of the two-step thermal dehydration process of CC-DH to form CC-AH via CC-MH (thermal dehydration of CC-DH to form CC-MH) at varying  $p(\text{H}_2\text{O})$  values: (a) SR and (b) PBR(2). ..... s15

**Figure S17.** Arrhenius plots of the individual physico-geometrical reaction steps for the second reaction step of the two-step thermal dehydration process of CC-DH to form CC-AH via CC-MH (thermal dehydration of CC-MH to form CC-AH) at varying  $p(\text{H}_2\text{O})$  values: (a) IP, (b) SR, and (c) PBR(2). ..... s15

**Table S4.** Apparent Arrhenius parameters of the component physico-geometrical processes involved in the two-step thermal dehydration process of CC-DH to form CC-AH via CC-MH at different  $p(\text{H}_2\text{O})$  values, as determined based on the SR–PBR(2) and IP–SR–PBR(2) models..... s16

**Figure S18.** Apparent linear correlations observed between  $\ln A_i$  and  $E_{a,i}$  values determined for the individual physico-geometrical reaction processes of the first and second reaction steps of the thermal dehydration process of CC-DH to form CC-AH via CC-MH based on SR–PBR(3) and IP–SR–PBR(3) models, respectively: (a) first and (b) second reaction steps. .... s16

## S1. Water vapor effect on the reaction pathway

Weibull function

$$F(t) = a_0 \left( \frac{a_3 - 1}{a_3} \right)^{\frac{1-a_3}{a_3}} \left\{ \frac{t - a_1}{a_2} + \left( \frac{a_3 - 1}{a_3} \right)^{\frac{1}{a_3}} \right\}^{a_3 - 1} \exp \left[ - \left\{ \frac{t - a_1}{a_2} + \left( \frac{a_3 - 1}{a_3} \right)^{\frac{1}{a_3}} \right\}^{a_3} + \frac{a_3 - 1}{a_3} \right] \quad (\text{S1})$$

where  $a_0$  is the amplitude,  $a_1$  is the center,  $a_2$  is the width, and  $a_3$  is the shape parameters.

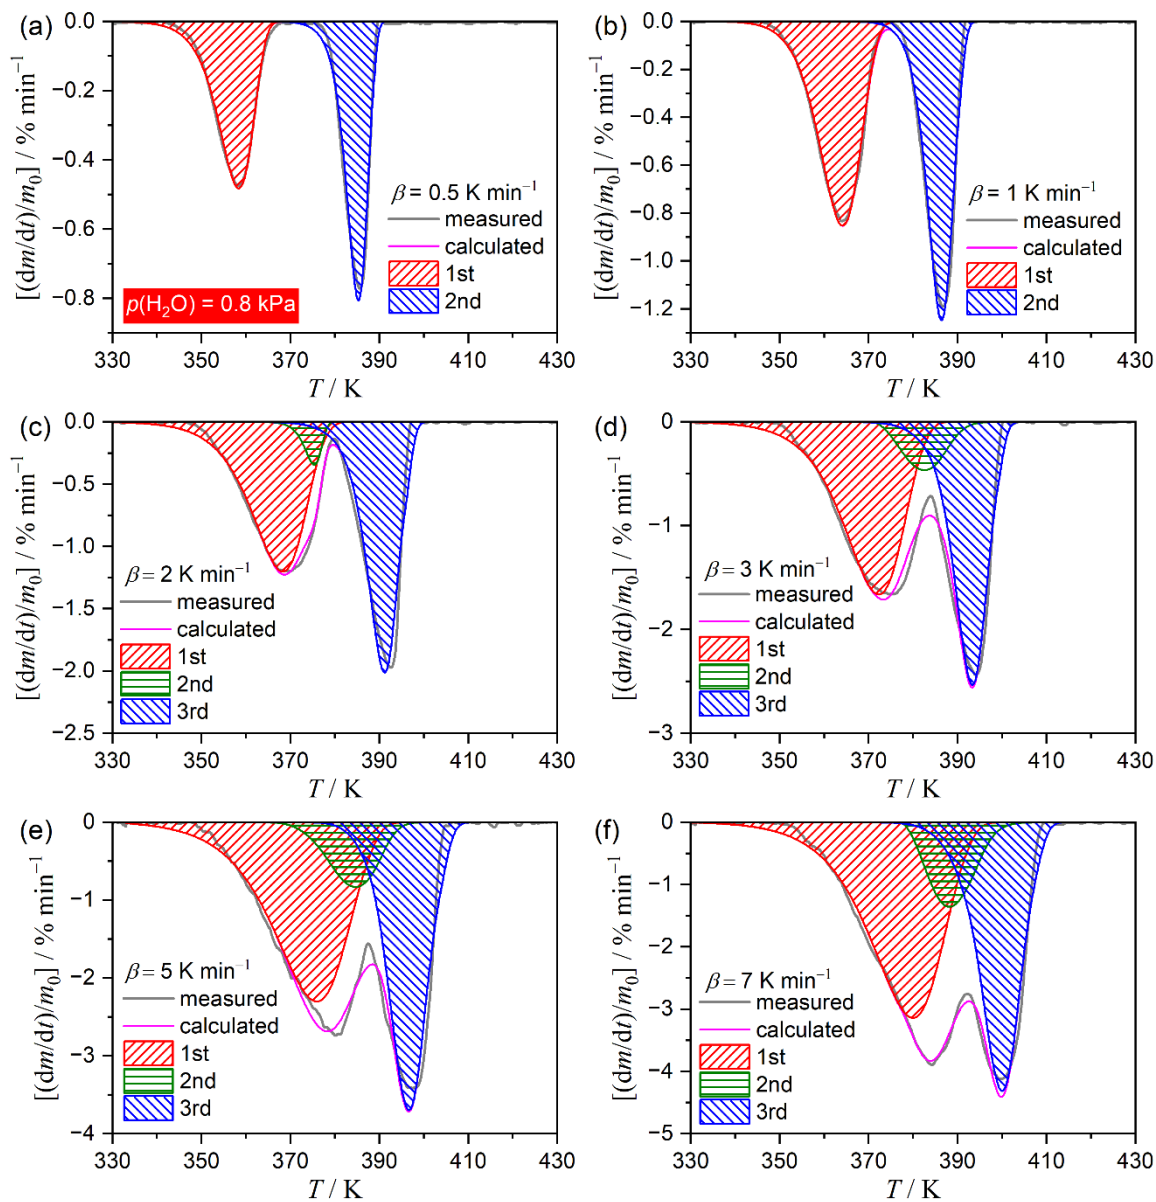

**Figure S1.** MDA results for the thermal dehydration process of CC-DH ( $m_0 = 3.01 \pm 0.04$  mg) to form CC-AH under linear nonisothermal conditions at various  $\beta$  values in a stream of wet  $\text{N}_2$  with  $p(\text{H}_2\text{O}) = 0.8$  kPa.

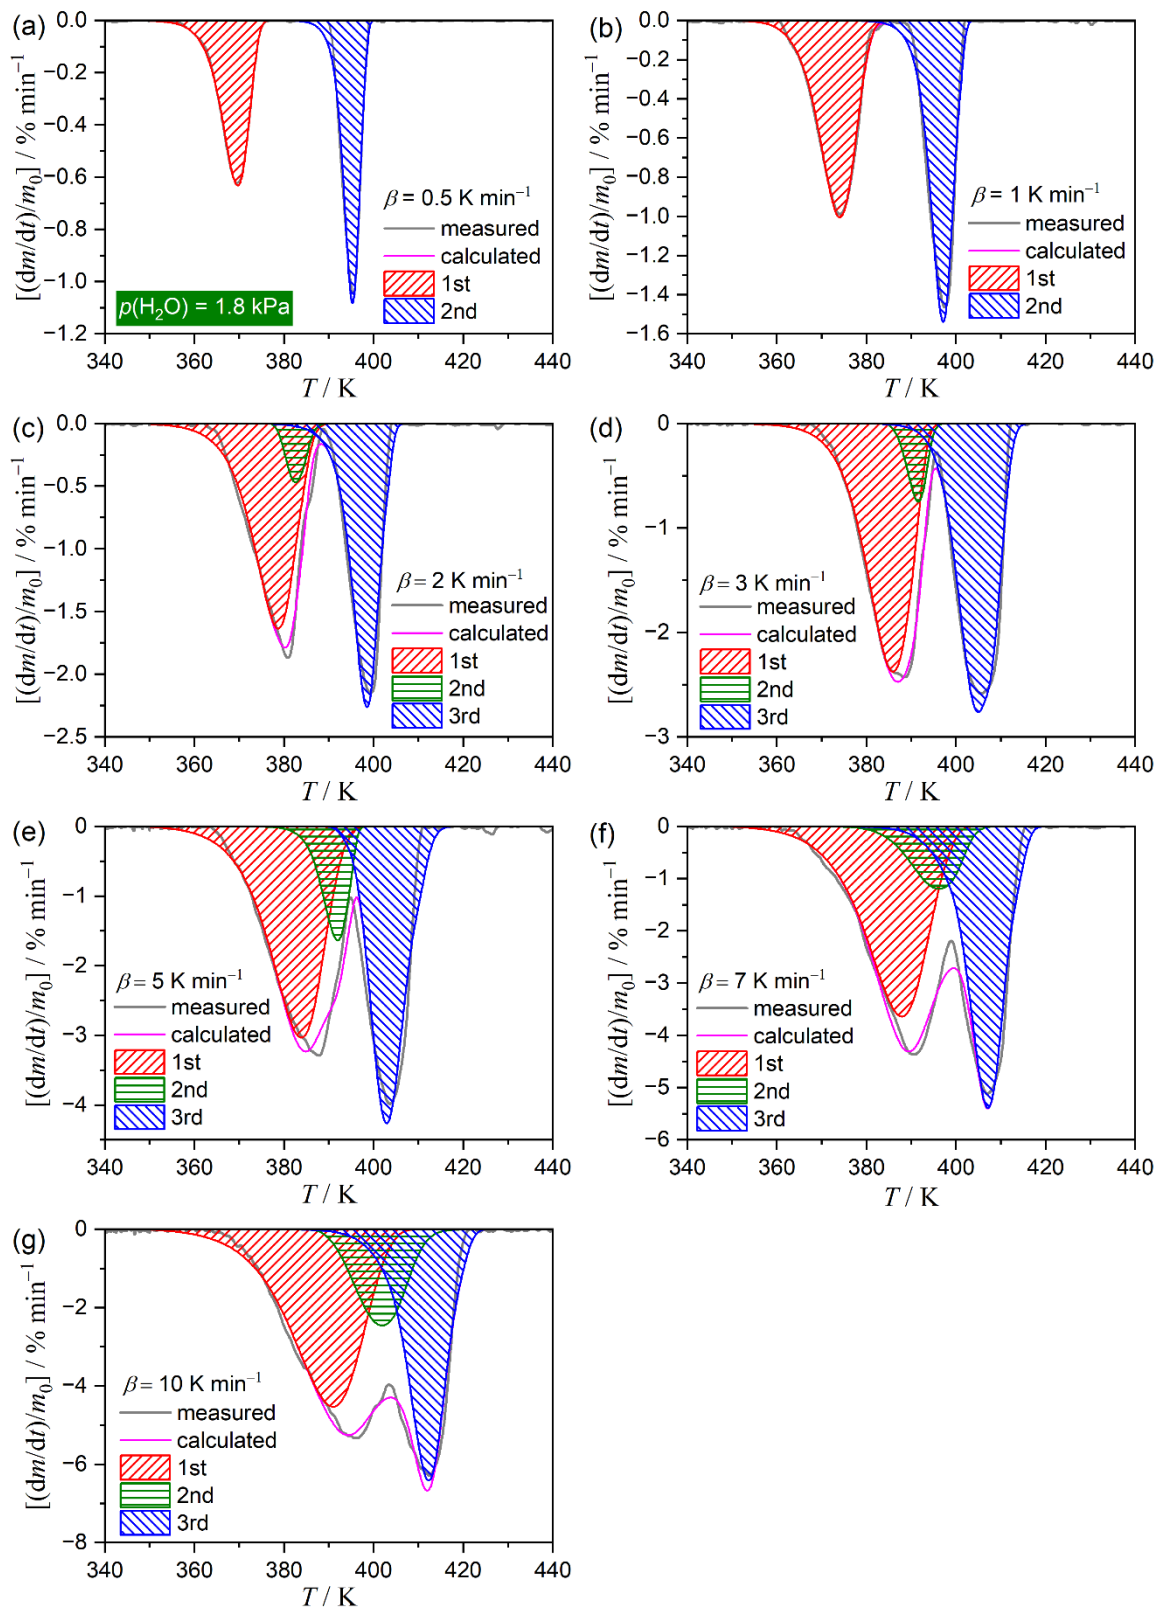

**Figure S2.** MDA results for the thermal dehydration process of CC-DH ( $m_0 = 3.02 \pm 0.06$  mg) to form CC-AH under linear nonisothermal conditions at various  $\beta$  values in a stream of wet  $N_2$  with  $p(H_2O) = 1.8$  kPa.

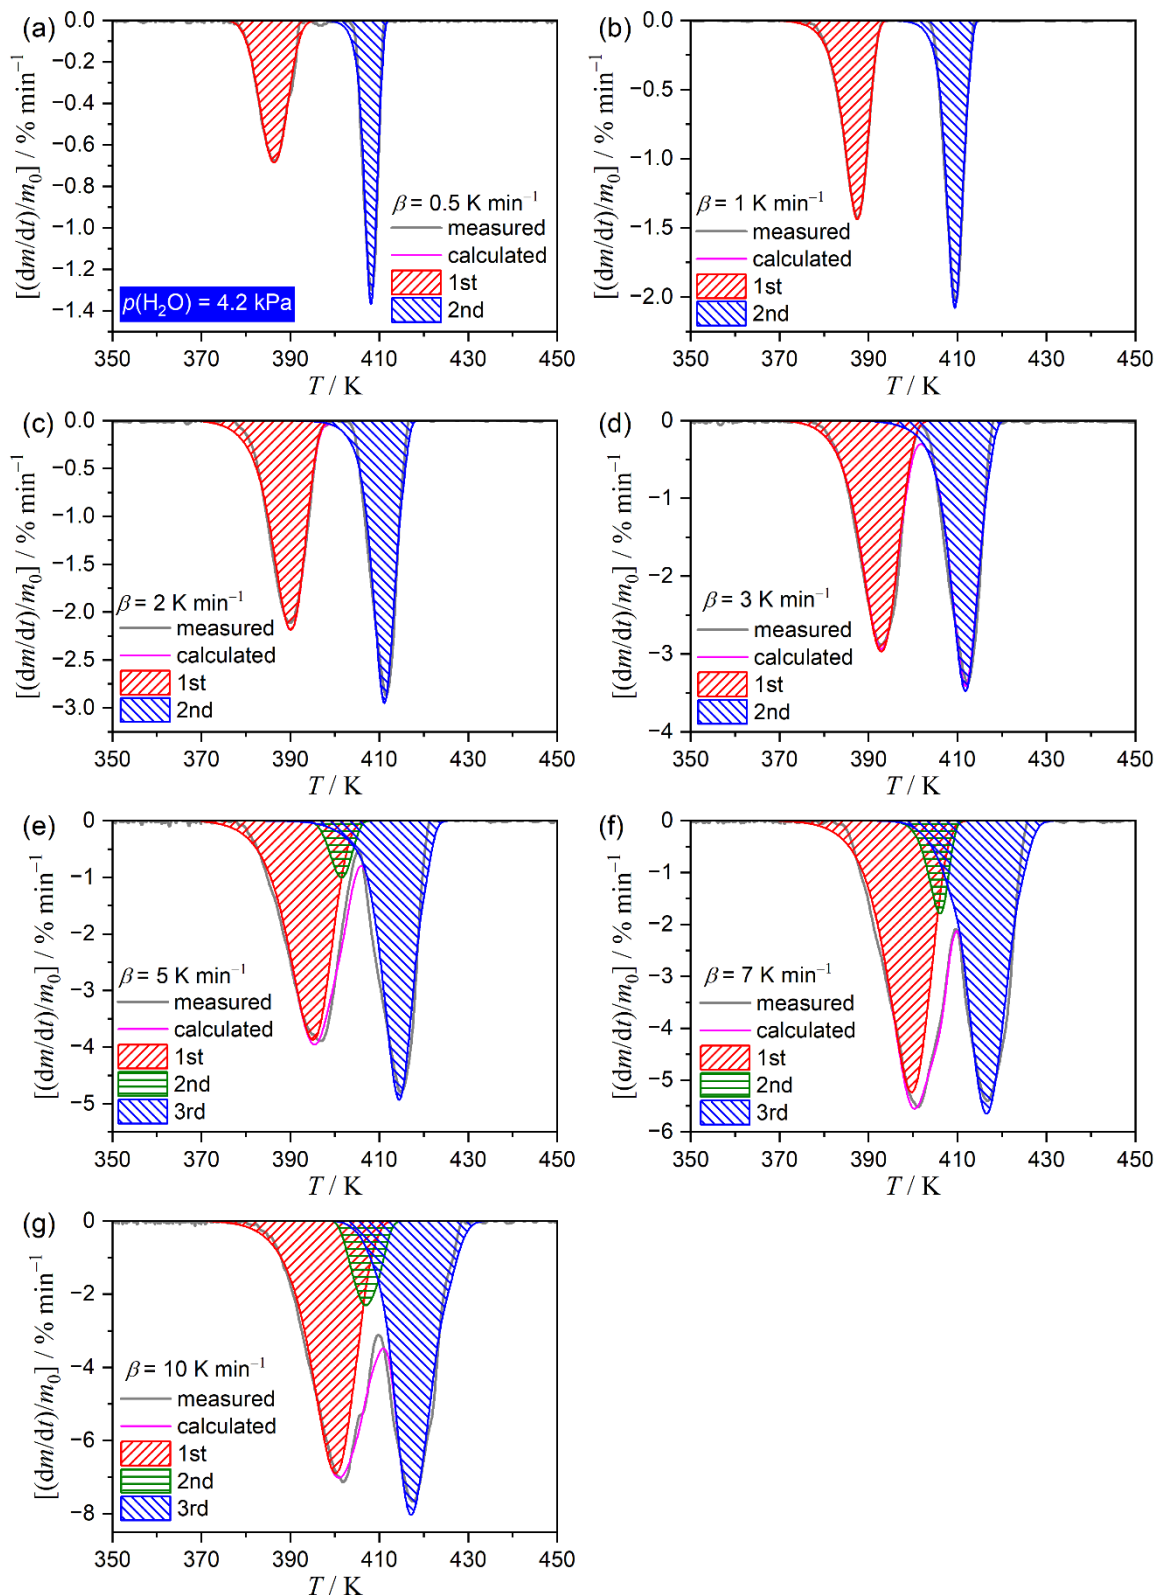

**Figure S3.** MDA results for the thermal dehydration process of CC-DH ( $m_0 = 3.03 \pm 0.05$  mg) to form CC-AH under linear nonisothermal conditions at various  $\beta$  values in a stream of wet  $N_2$  with  $p(H_2O) = 4.2$  kPa.

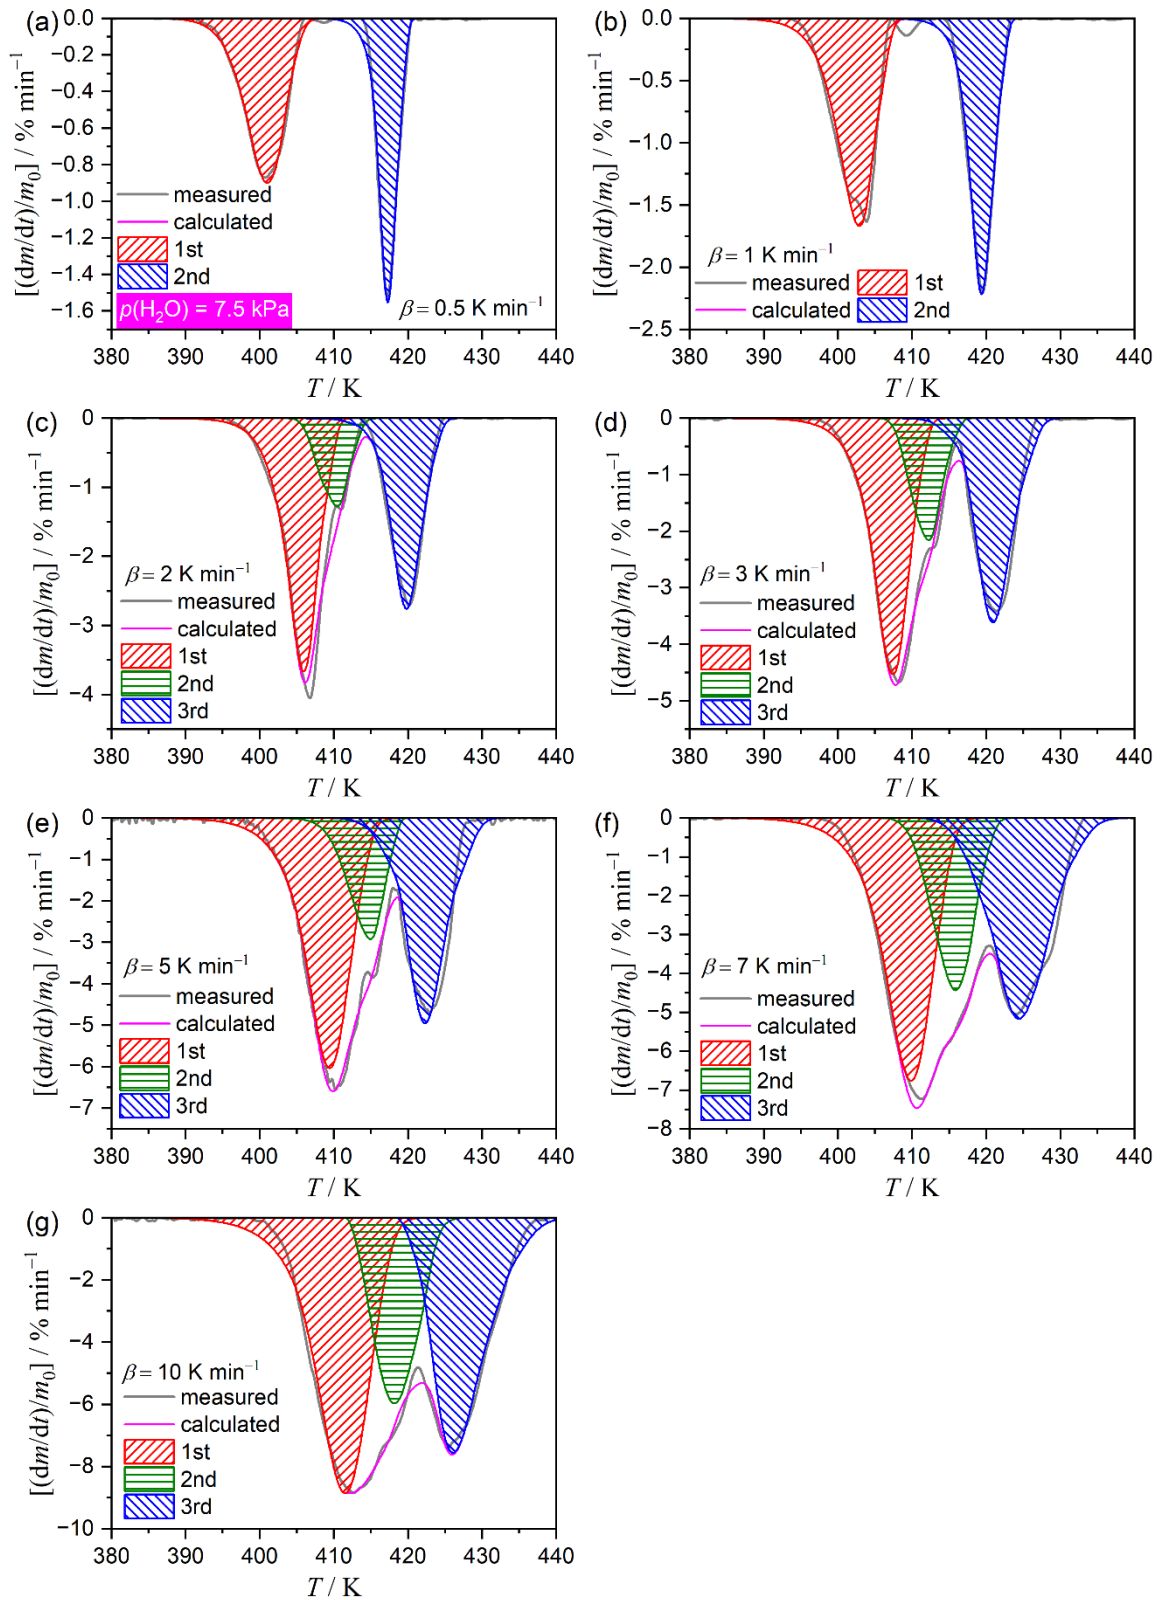

**Figure S4.** MDA results for the thermal dehydration process of CC-DH ( $m_0 = 3.02 \pm 0.04$  mg) to form CC-AH under linear nonisothermal conditions at various  $\beta$  values in a stream of wet  $N_2$  with  $p(H_2O) = 7.5$  kPa.

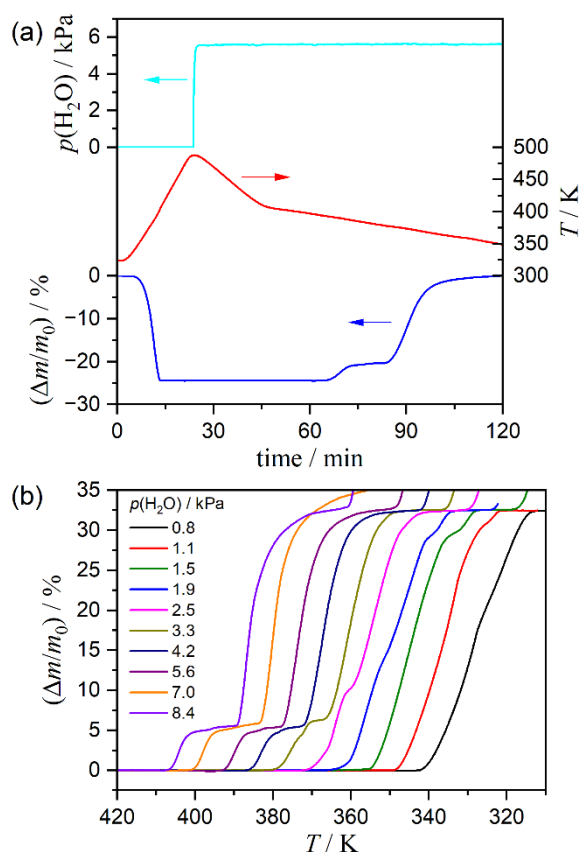

**Figure S5.** TG curves for hydration process of CC-AH under linear cooling at  $1 \text{ K min}^{-1}$  in a stream of wet  $\text{N}_2$  ( $q_v = 200 \text{ cm}^3 \text{ min}^{-1}$ ): (a) typical measurement scheme for the rehydration process and (b) TG curves at various  $p(\text{H}_2\text{O})$  values. Measurements were performed using a humidity-controlled TG system constructed by coupling TG–DTA (TG8122, Rigaku) and a humidity controller (me-40DP-2PHW, Micro Equipment Co.). Initially, the CC-DH sample (300–500  $\mu\text{m}$ ,  $m_0$ : approximately 3.0 mg) was heated to 473 K at a  $\beta$  of  $5 \text{ K min}^{-1}$  in a stream of dry  $\text{N}_2$  and subsequently cooled to a temperature of 423–408 K at a cooling rate of  $5 \text{ K min}^{-1}$ .

## S2. Kinetics of the component reaction steps at different $p(\text{H}_2\text{O})$ values

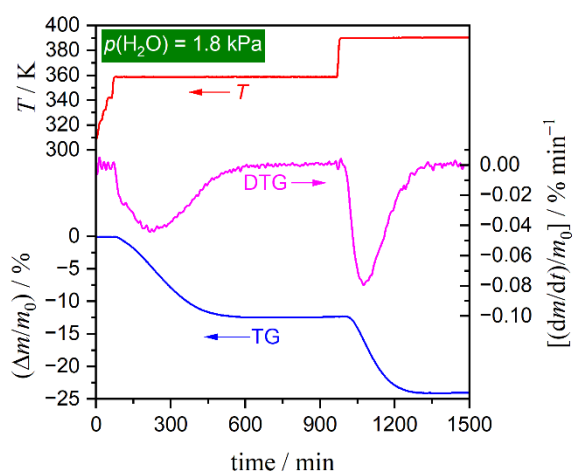

**Figure S6.** An example of TG–DTG measurement conducted for the two-step thermal dehydration process of CC-DH to form CC-AH via CC-MH recorded by heating the sample ( $m_0 = 3.084 \text{ mg}$ ) according to two-step isothermal heating program in a stream of wet  $\text{N}_2$  with  $p(\text{H}_2\text{O}) = 1.8 \text{ kPa}$ .

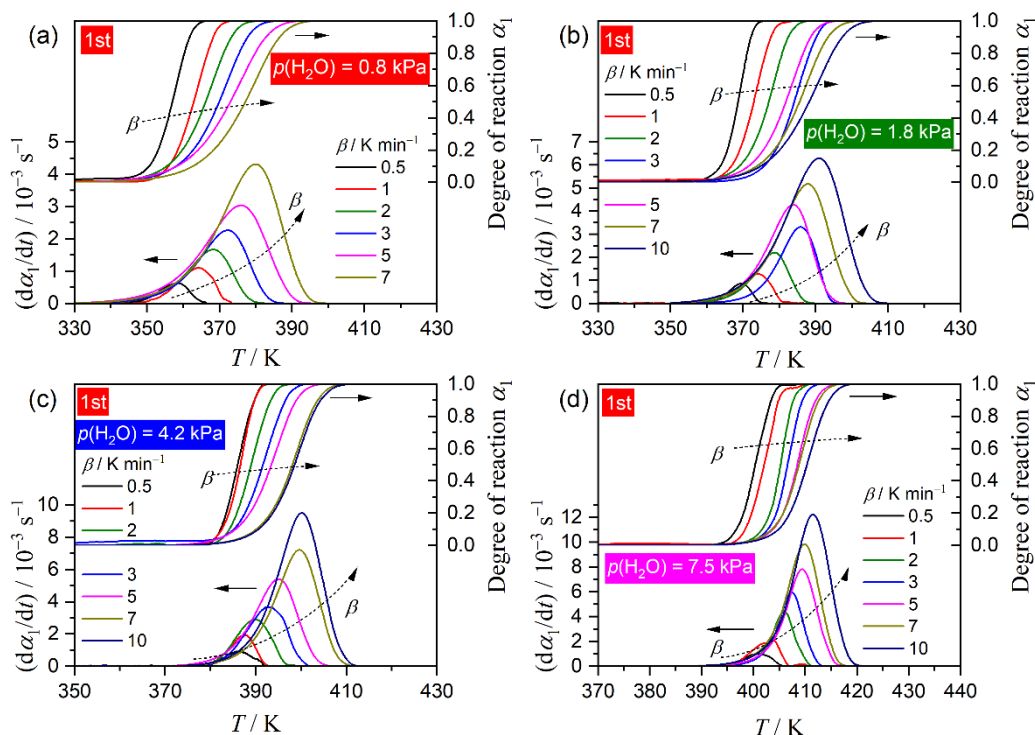

**Figure S7.** Kinetic curves for the first reaction step of the two-step thermal dehydration of CC-DH to form CC-AH via CC-MH (thermal dehydration of CC-DH to form CC-MH) under linear nonisothermal conditions at various  $\beta$  values in a stream of wet  $N_2$  with different  $p(H_2O)$  values, extracted from the overall two-step thermal dehydration process of CC-DH to form CC-AH via CC-MH using MDA: (a) 0.8, (b) 1.8, (c) 4.2, and (d) 7.5 kPa.

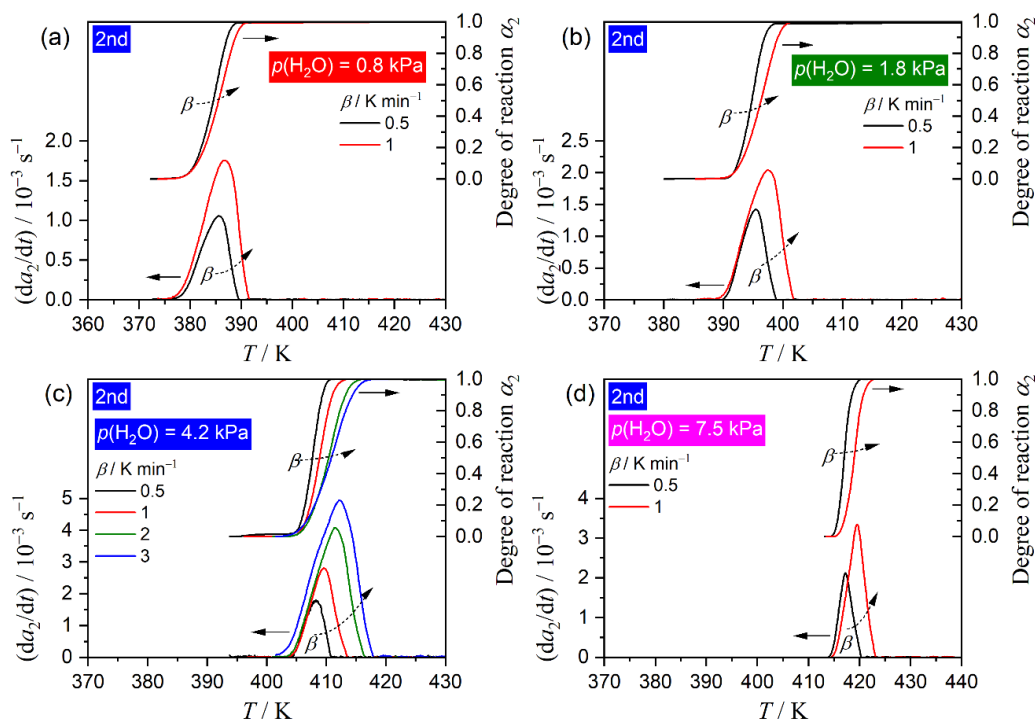

**Figure S8.** Kinetic curves for the second reaction step of the two-step thermal dehydration of CC-DH to form CC-AH via CC-MH (thermal dehydration of CC-MH to form CC-AH) under linear nonisothermal conditions at different  $\beta$  values in a stream of wet  $N_2$  with different  $p(H_2O)$  values, extracted from the overall two-step thermal dehydration process of CC-DH to form CC-AH via CC-MH using MDA: (a) 0.8, (b) 1.8, (c) 4.2, and (d) 7.5 kPa.



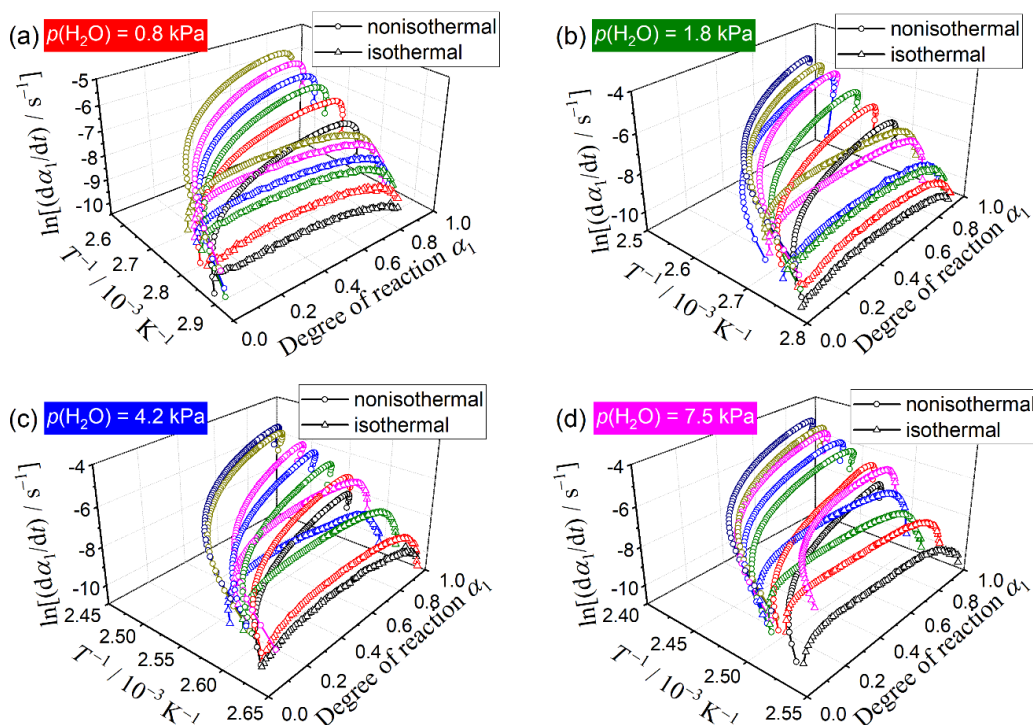

**Figure S9.** Kinetic curves for the first reaction step of the two-step thermal dehydration process of CC-DH to form CC-AH via CC-MH (thermal dehydration of CC-DH to form CC-MH) under isothermal and linear nonisothermal conditions at various  $p(\text{H}_2\text{O})$  values, represented in the 3D kinetic coordinate of  $T^{-1}$ ,  $\alpha_1$ , and  $\ln(d\alpha_1/dt)$ : (a) 0.8, (b) 1.8, (c) 4.2, and (d) 7.5 kPa.

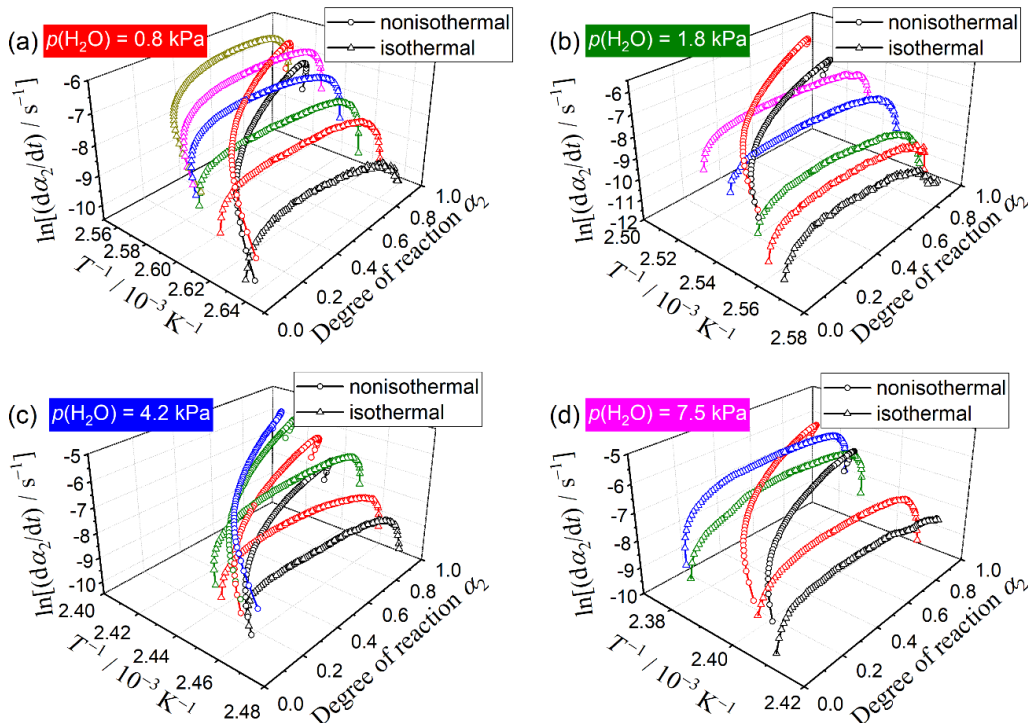

**Figure S10.** Kinetic curves for the second reaction step of the two-step thermal dehydration process of CC-DH to form CC-AH via CC-MH (thermal dehydration of CC-MH to form CC-AH) under isothermal and linear nonisothermal conditions at various  $p(\text{H}_2\text{O})$  values, represented in the 3D kinetic coordinate of  $T^{-1}$ ,  $\alpha_2$ , and  $\ln(d\alpha_2/dt)$ : (a) 0.8, (b) 1.8, (c) 4.2, and (d) 7.5 kPa.

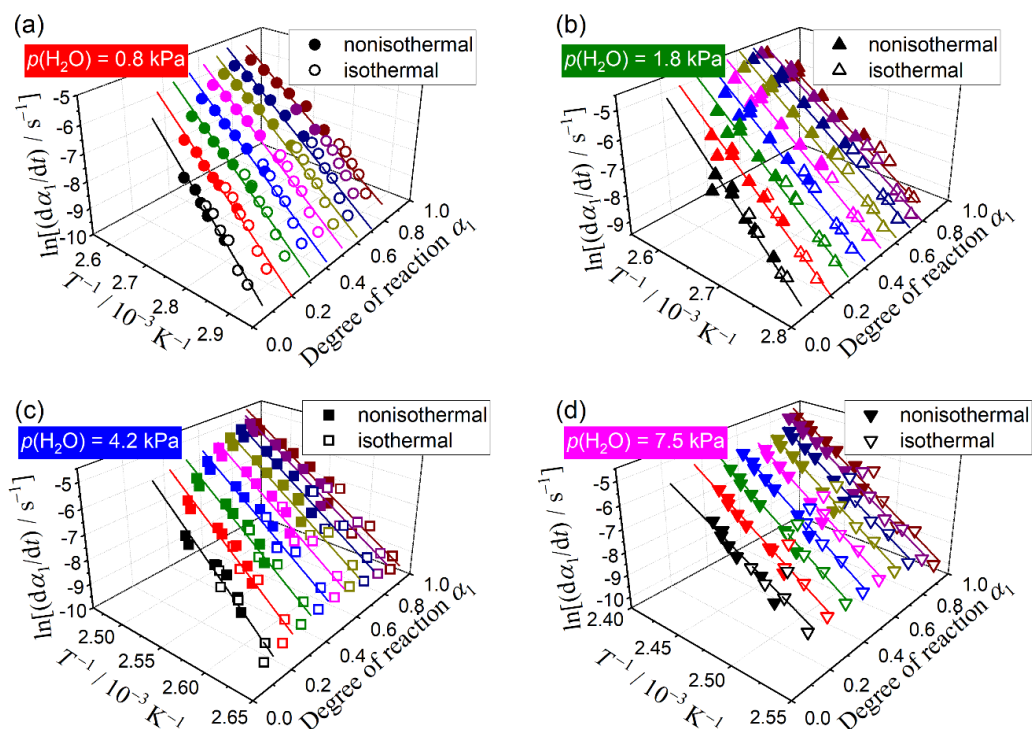

**Figure S11.** Friedman plots at different  $\alpha_1$  for the first reaction step of the two-step thermal dehydration process of CC-DH to form CC-AH via CC-MH (thermal dehydration of CC-DH to form CC-MH) at various  $p(H_2O)$  values: (a) 0.8, (b) 1.8, (c) 4.2, and (d) 7.5 kPa.

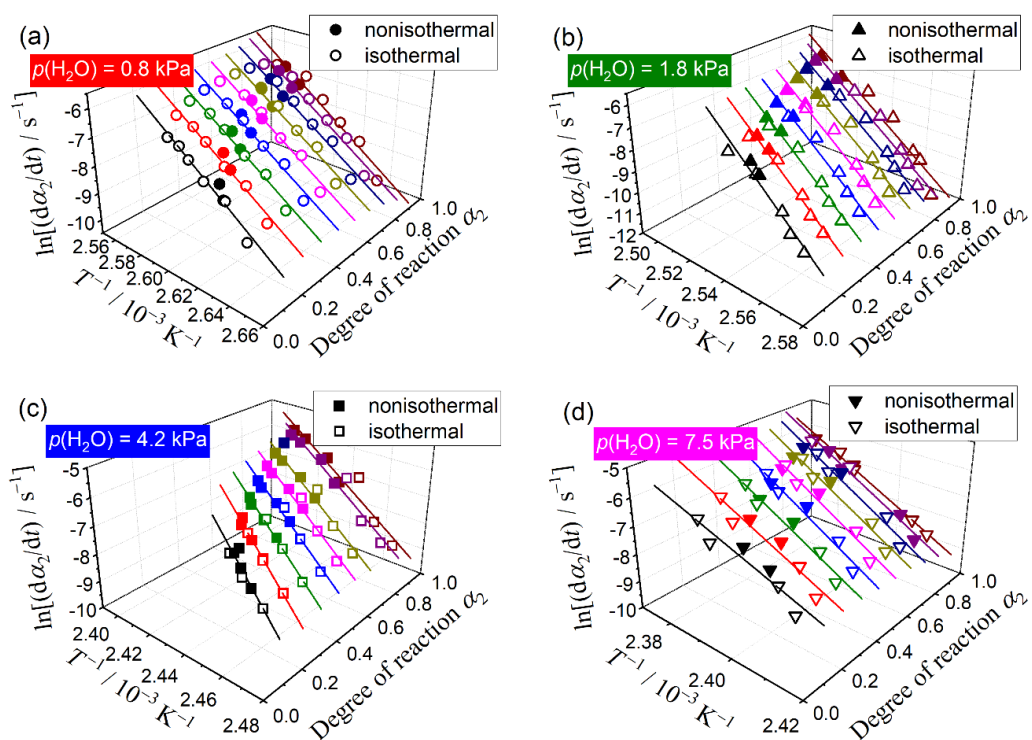

**Figure S12.** Friedman plots at different  $\alpha_2$  for the second reaction step of the two-step thermal dehydration of CC-DH to form CC-AH via CC-MH (thermal dehydration of CC-MH to form CC-AH) at various  $p(H_2O)$  values: (a) 0.8, (b) 1.8, (c) 4.2, and (d) 7.5 kPa.

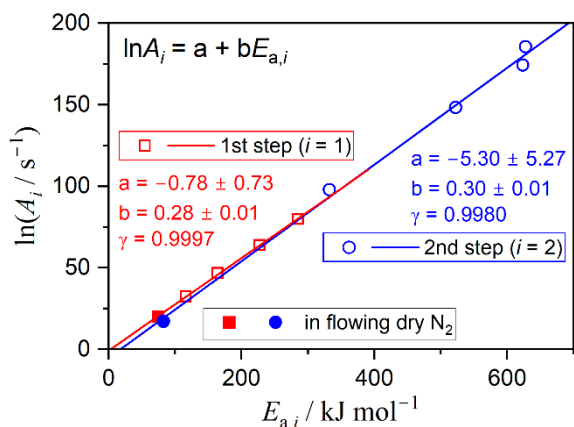

**Figure S13.** Apparent linear correlations observed between  $\ln A_i$  and  $E_{a,i}$  values established for the first and second reaction steps of the thermal dehydration process of CC-DH to form CC-AH via CC-MH using the conventional Friedman plot and master plot methods.

### S3. Kinetic modeling based on IP–SR–PBR( $n$ ) models

**Table S1.** Differential kinetic equations of IP–SR–PBR( $n$ ) models

| $n$ | $\frac{d\alpha}{dt} =$                                                                                                                                                                                                                                                                                                                                                                                                                                                                                                                                                                                                                                                                                                                                                                         |
|-----|------------------------------------------------------------------------------------------------------------------------------------------------------------------------------------------------------------------------------------------------------------------------------------------------------------------------------------------------------------------------------------------------------------------------------------------------------------------------------------------------------------------------------------------------------------------------------------------------------------------------------------------------------------------------------------------------------------------------------------------------------------------------------------------------|
| 1   | <p>a) <math>t - 1/k_{IP} \leq 1/k_{PBR(1)}</math>:</p> $k_{PBR(1)} \left[ 1 - \exp\left(-k_{SR} \left(t - \frac{1}{k_{IP}}\right)\right) \right]$ <p>b) <math>t - 1/k_{IP} \geq 1/k_{PBR(1)}</math>:</p> $k_{PBR(1)} \exp\left(-k_{SR} \left(t - \frac{1}{k_{IP}}\right)\right) \left[ \exp\left(\frac{k_{SR}}{k_{PBR(1)}}\right) - 1 \right]$                                                                                                                                                                                                                                                                                                                                                                                                                                                 |
| 2   | <p>a) <math>t - 1/k_{IP} \leq 1/k_{PBR(2)}</math>:</p> $-2k_{PBR(2)} \left[ \left(1 + \frac{k_{PBR(2)}}{k_{SR}}\right) \exp\left(-k_{SR} \left(t - \frac{1}{k_{IP}}\right)\right) + k_{PBR(2)} \left(t - \frac{1}{k_{IP}}\right) - \left(1 + \frac{k_{PBR(2)}}{k_{SR}}\right) \right]$ <p>b) <math>t - 1/k_{IP} \geq 1/k_{PBR(2)}</math>:</p> $-2k_{PBR(2)} \exp\left(-k_{SR} \left(t - \frac{1}{k_{IP}}\right)\right) \left[ 1 + \frac{k_{PBR(2)}}{k_{SR}} - \frac{k_{PBR(2)}}{k_{SR}} \exp\left(\frac{k_{SR}}{k_{PBR(2)}}\right) \right]$                                                                                                                                                                                                                                                    |
| 3   | <p>a) <math>t - 1/k_{IP} \leq 1/k_{PBR(3)}</math>:</p> $-3k_{PBR(3)} \left[ \left(1 + 2\frac{k_{PBR(3)}}{k_{SR}} + 2\left(\frac{k_{PBR(3)}}{k_{SR}}\right)^2\right) \exp\left(-k_{SR} \left(t - \frac{1}{k_{IP}}\right)\right) - \left(-k_{PBR(3)} \left(t - \frac{1}{k_{IP}}\right)\right)^2 + 2k_{PBR(3)} \left(\frac{k_{PBR(3)}}{k_{SR}} + 1\right) \left(t - \frac{1}{k_{IP}}\right) - \left(1 + 2\frac{k_{PBR(3)}}{k_{SR}} + 2\left(\frac{k_{PBR(3)}}{k_{SR}}\right)^2\right) \right]$ <p>b) <math>t - 1/k_{IP} \geq 1/k_{PBR(3)}</math>:</p> $3k_{PBR(3)} \exp\left(-k_{SR} \left(t - \frac{1}{k_{IP}}\right)\right) \left[ 2\left(\frac{k_{PBR(3)}}{k_{SR}}\right)^2 \left(\exp\left(\frac{k_{SR}}{k_{PBR(3)}}\right) - 1\right) - \left(1 + 2\frac{k_{PBR(3)}}{k_{SR}}\right) \right]$ |

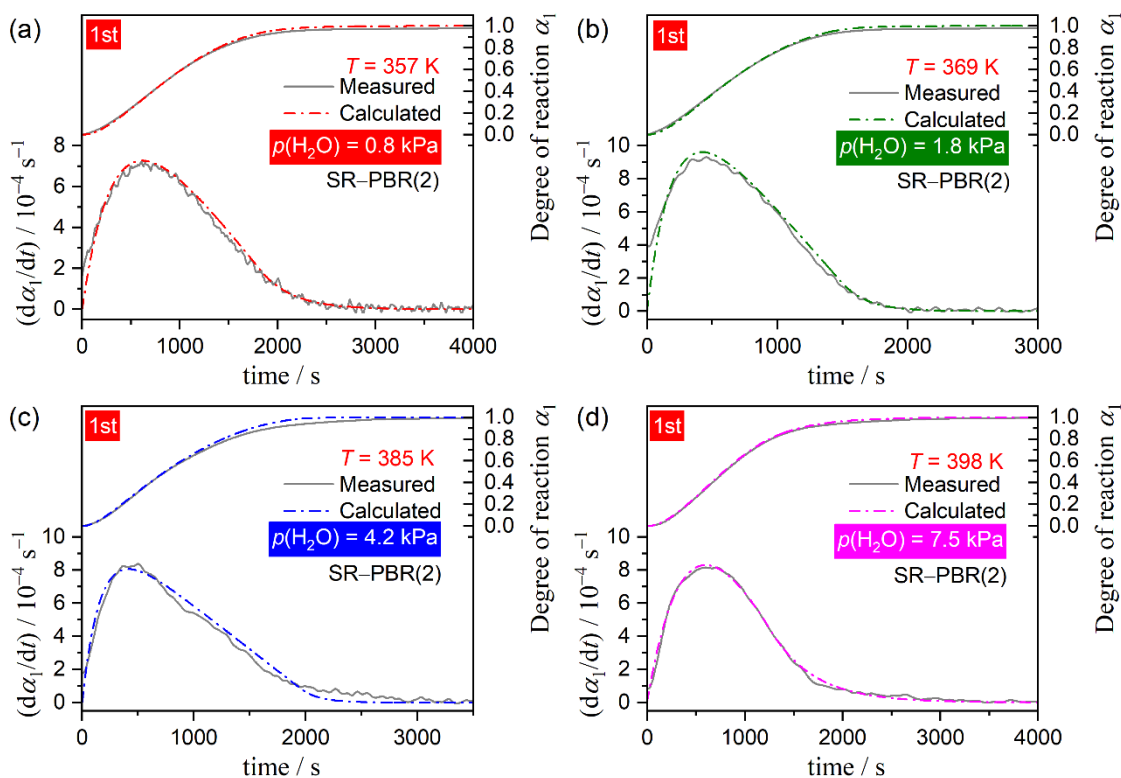

**Figure S14.** Typical fitting results using SR-PBR(2) model for the first reaction step of the two-step thermal dehydration process of CC-DH to form CC-AH via CC-MH (thermal dehydration of CC-DH to form CC-MH) under isothermal conditions at various  $p(\text{H}_2\text{O})$  values: (a) 0.8, (b) 1.8, (c) 4.2, and (d) 7.5 kPa.

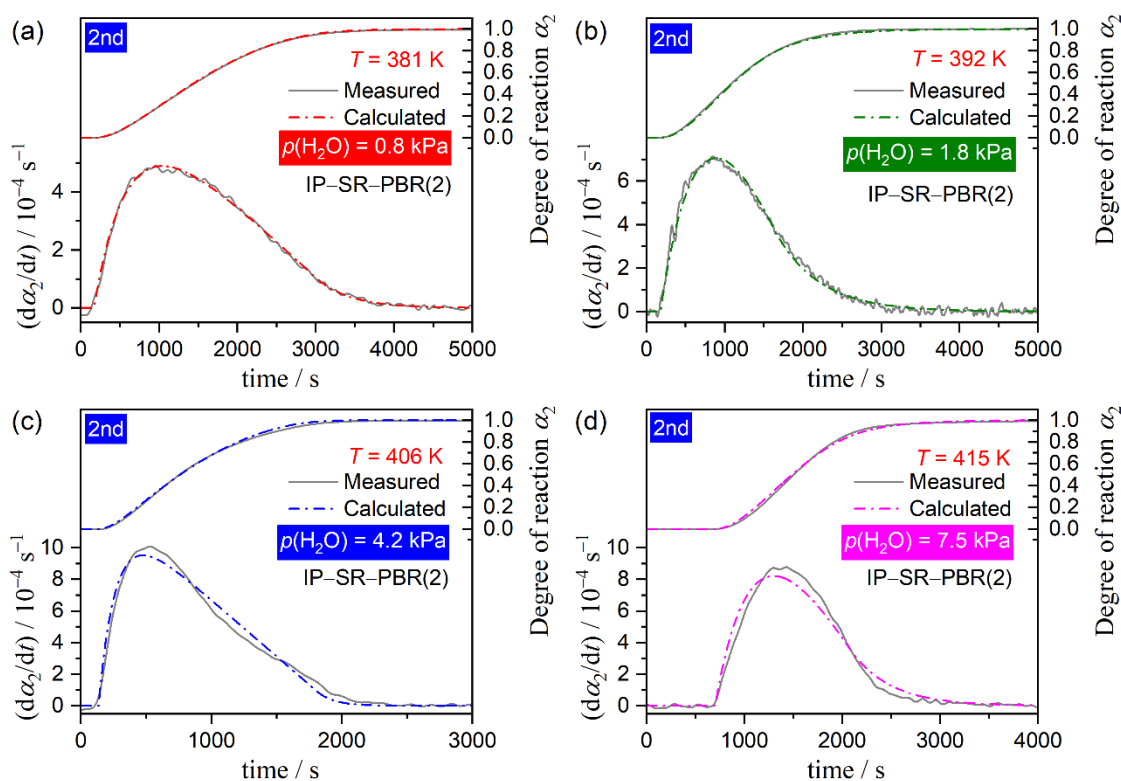

**Figure S15.** Typical fitting results using IP-SR-PBR(2) model for the second reaction step of the two-step thermal dehydration process of CC-DH to form CC-AH via CC-MH (thermal dehydration of CC-MH to form CC-AH) under isothermal conditions at various  $p(\text{H}_2\text{O})$  values: (a) 0.8, (b) 1.8, (c) 4.2, and (d) 7.5 kPa.

## Supplementary Information

**Table S2.** Optimized rate constants of the SR–PBR(*n*) models for the first reaction step of the two-step thermal dehydration process of CC-DH to form CC-AH via CC-MH (thermal dehydration of CC-DH to form CC-MH) at various temperatures and  $p(\text{H}_2\text{O})$  values

| model     | $p(\text{H}_2\text{O})/\text{kPa}$ | $T/\text{K}$ | Rate constant                   |                                 |                                     | $R^2,^a$              |
|-----------|------------------------------------|--------------|---------------------------------|---------------------------------|-------------------------------------|-----------------------|
|           |                                    |              | $k_{\text{IP},1}/\text{s}^{-1}$ | $k_{\text{SR},1}/\text{s}^{-1}$ | $k_{\text{PBR}(n),1}/\text{s}^{-1}$ |                       |
| SR–PBR(3) | 0.8                                | 356.7        | -----                           | $3.75 \times 10^{-3}$           | $3.67 \times 10^{-4}$               | 0.9922                |
|           |                                    | 354.6        | -----                           | $3.05 \times 10^{-3}$           | $2.90 \times 10^{-4}$               | 0.9948                |
|           |                                    | 352.5        | -----                           | $1.86 \times 10^{-3}$           | $1.82 \times 10^{-4}$               | 0.9946                |
|           |                                    | 350.3        | -----                           | $1.51 \times 10^{-3}$           | $1.30 \times 10^{-4}$               | 0.9848                |
|           |                                    | 347.8        | -----                           | $9.65 \times 10^{-4}$           | $6.24 \times 10^{-5}$               | 0.9822                |
|           |                                    | 345.3        | -----                           | $7.39 \times 10^{-4}$           | $3.70 \times 10^{-5}$               | 0.9789                |
|           | 1.7                                | 368.8        | -----                           | $3.62 \times 10^{-3}$           | $5.68 \times 10^{-4}$               | 0.9965                |
|           |                                    | 366.5        | -----                           | $1.74 \times 10^{-3}$           | $4.02 \times 10^{-4}$               | 0.9910                |
|           |                                    | 362.4        | -----                           | $6.02 \times 10^{-4}$           | $1.50 \times 10^{-4}$               | 0.9741                |
|           |                                    | 361.4        | -----                           | $5.88 \times 10^{-4}$           | $1.41 \times 10^{-4}$               | 0.9903                |
|           |                                    | 359.4        | -----                           | $3.68 \times 10^{-4}$           | $7.12 \times 10^{-5}$               | 0.9726                |
|           | 4.1                                | 387.8        | -----                           | $5.83 \times 10^{-3}$           | $1.48 \times 10^{-3}$               | 0.9353                |
|           |                                    | 382.4        | -----                           | $2.22 \times 10^{-3}$           | $5.65 \times 10^{-4}$               | 0.9690                |
|           |                                    | 378.5        | -----                           | $7.26 \times 10^{-4}$           | $1.91 \times 10^{-4}$               | 0.9211                |
|           | 7.4                                | 402.3        | -----                           | $8.44 \times 10^{-3}$           | $2.05 \times 10^{-3}$               | 0.9427                |
|           |                                    | 400.3        | -----                           | $4.07 \times 10^{-3}$           | $1.00 \times 10^{-3}$               | 0.9860                |
|           |                                    | 398.0        | -----                           | $2.19 \times 10^{-3}$           | $5.94 \times 10^{-4}$               | 0.9960                |
|           |                                    | 395.5        | -----                           | $2.21 \times 10^{-3}$           | $3.57 \times 10^{-4}$               | 0.9955                |
|           |                                    | 392.7        | -----                           | $7.54 \times 10^{-4}$           | $1.51 \times 10^{-4}$               | 0.9957                |
|           | SR–PBR(2)                          | 0.8          | 356.7                           | -----                           | $4.55 \times 10^{-3}$               | $4.98 \times 10^{-4}$ |
| 354.6     |                                    |              | -----                           | $4.32 \times 10^{-3}$           | $3.63 \times 10^{-4}$               | 0.9963                |
| 352.5     |                                    |              | -----                           | $2.61 \times 10^{-3}$           | $2.28 \times 10^{-4}$               | 0.9964                |
| 350.3     |                                    |              | -----                           | $2.34 \times 10^{-3}$           | $1.74 \times 10^{-4}$               | 0.9941                |
| 347.8     |                                    |              | -----                           | $1.61 \times 10^{-3}$           | $8.00 \times 10^{-5}$               | 0.9753                |
| 345.3     |                                    |              | -----                           | $1.23 \times 10^{-3}$           | $4.77 \times 10^{-5}$               | 0.9876                |
| 1.7       |                                    | 368.8        | -----                           | $3.59 \times 10^{-3}$           | $7.72 \times 10^{-4}$               | 0.9944                |
|           |                                    | 366.5        | -----                           | $1.99 \times 10^{-3}$           | $5.01 \times 10^{-4}$               | 0.9975                |
|           |                                    | 362.4        | -----                           | $6.65 \times 10^{-4}$           | $1.91 \times 10^{-4}$               | 0.9864                |
|           |                                    | 361.4        | -----                           | $7.18 \times 10^{-4}$           | $1.70 \times 10^{-4}$               | 0.9943                |
|           |                                    | 359.4        | -----                           | $3.30 \times 10^{-4}$           | $1.03 \times 10^{-4}$               | 0.9867                |
| 4.1       |                                    | 387.8        | -----                           | $6.82 \times 10^{-3}$           | $1.83 \times 10^{-3}$               | 0.9869                |
|           |                                    | 382.4        | -----                           | $2.39 \times 10^{-3}$           | $7.32 \times 10^{-4}$               | 0.9831                |
|           |                                    | 378.5        | -----                           | $7.80 \times 10^{-4}$           | $2.51 \times 10^{-4}$               | 0.9423                |
| 7.4       |                                    | 402.3        | -----                           | $9.93 \times 10^{-3}$           | $2.64 \times 10^{-3}$               | 0.9632                |
|           |                                    | 400.3        | -----                           | $5.43 \times 10^{-3}$           | $1.17 \times 10^{-3}$               | 0.9930                |
|           |                                    | 398.0        | -----                           | $3.26 \times 10^{-3}$           | $7.84 \times 10^{-4}$               | 0.9711                |
|           |                                    | 395.5        | -----                           | $2.53 \times 10^{-3}$           | $4.55 \times 10^{-4}$               | 0.9964                |
|           |                                    | 392.7        | -----                           | $1.00 \times 10^{-3}$           | $1.78 \times 10^{-4}$               | 0.9959                |

<sup>a</sup> Determination coefficient of the nonlinear least-squares analysis.

**Table S3.** Optimized rate constants of the IP–SR–PBR(*n*) models for the second reaction step of the two-step thermal dehydration process of CC-DH to form CC-AH via CC-MH (thermal dehydration of CC-MH to form CC-AH) at various temperatures and  $p(\text{H}_2\text{O})$  values

| model        | $p(\text{H}_2\text{O})/\text{kPa}$ | $T/\text{K}$ | Rate constant                   |                                 |                                     | $R^2, ^a$ |
|--------------|------------------------------------|--------------|---------------------------------|---------------------------------|-------------------------------------|-----------|
|              |                                    |              | $k_{\text{IP},2}/\text{s}^{-1}$ | $k_{\text{SR},2}/\text{s}^{-1}$ | $k_{\text{PBR}(n),2}/\text{s}^{-1}$ |           |
| IP–SR–PBR(3) | 0.8                                | 386.7        | -----                           | $6.30 \times 10^{-3}$           | $1.29 \times 10^{-3}$               | 0.9792    |
|              |                                    | 384.7        | -----                           | $3.89 \times 10^{-3}$           | $8.37 \times 10^{-4}$               | 0.9948    |
|              |                                    | 382.8        | $9.43 \times 10^{-3}$           | $2.38 \times 10^{-3}$           | $4.30 \times 10^{-4}$               | 0.9942    |
|              |                                    | 380.8        | $5.00 \times 10^{-3}$           | $1.47 \times 10^{-3}$           | $3.05 \times 10^{-4}$               | 0.9916    |
|              |                                    | 378.9        | $2.75 \times 10^{-3}$           | $8.09 \times 10^{-4}$           | $9.88 \times 10^{-5}$               | 0.9961    |
|              | 1.7                                | 394.8        | $1.06 \times 10^{-2}$           | $3.25 \times 10^{-3}$           | $7.43 \times 10^{-4}$               | 0.9903    |
|              |                                    | 392.4        | $5.00 \times 10^{-3}$           | $2.19 \times 10^{-3}$           | $4.57 \times 10^{-4}$               | 0.9989    |
|              |                                    | 390.6        | $1.25 \times 10^{-3}$           | $8.93 \times 10^{-4}$           | $1.04 \times 10^{-4}$               | 0.9476    |
|              |                                    | 390.0        | $7.89 \times 10^{-4}$           | $6.49 \times 10^{-4}$           | $6.37 \times 10^{-5}$               | 0.9250    |
|              | 4.2                                | 408.2        | $1.69 \times 10^{-2}$           | $9.19 \times 10^{-3}$           | $1.55 \times 10^{-3}$               | 0.9686    |
|              |                                    | 406.5        | $7.35 \times 10^{-3}$           | $3.59 \times 10^{-3}$           | $5.85 \times 10^{-4}$               | 0.9941    |
|              |                                    | 404.5        | $2.85 \times 10^{-3}$           | $1.75 \times 10^{-3}$           | $2.52 \times 10^{-4}$               | 0.9746    |
|              |                                    | 402.7        | $7.98 \times 10^{-4}$           | -----                           | -----                               | -----     |
|              | 7.5                                | 419.6        | $1.11 \times 10^{-2}$           | $9.78 \times 10^{-3}$           | $1.79 \times 10^{-3}$               | 0.9462    |
|              |                                    | 415.3        | $1.43 \times 10^{-3}$           | $2.26 \times 10^{-3}$           | $5.69 \times 10^{-4}$               | 0.9779    |
|              |                                    | 413.5        | $9.09 \times 10^{-4}$           | $8.02 \times 10^{-4}$           | $2.76 \times 10^{-4}$               | 0.9811    |
| IP–SR–PBR(2) | 0.8                                | 386.7        | -----                           | $7.68 \times 10^{-3}$           | $1.60 \times 10^{-3}$               | 0.9872    |
|              |                                    | 384.7        | -----                           | $5.07 \times 10^{-3}$           | $9.84 \times 10^{-4}$               | 0.9989    |
|              |                                    | 382.8        | $9.43 \times 10^{-3}$           | $3.35 \times 10^{-3}$           | $5.00 \times 10^{-4}$               | 0.9984    |
|              |                                    | 380.8        | $5.95 \times 10^{-3}$           | $2.32 \times 10^{-3}$           | $3.54 \times 10^{-4}$               | 0.9993    |
|              |                                    | 378.9        | $2.75 \times 10^{-3}$           | $1.12 \times 10^{-3}$           | $1.16 \times 10^{-4}$               | 0.9940    |
|              | 1.7                                | 394.8        | $1.14 \times 10^{-2}$           | $4.53 \times 10^{-3}$           | $8.91 \times 10^{-4}$               | 0.9935    |
|              |                                    | 392.4        | $5.00 \times 10^{-3}$           | $1.78 \times 10^{-3}$           | $7.04 \times 10^{-4}$               | 0.9959    |
|              |                                    | 390.6        | $1.25 \times 10^{-3}$           | $1.27 \times 10^{-3}$           | $1.48 \times 10^{-4}$               | 0.9734    |
|              |                                    | 390.0        | $7.89 \times 10^{-4}$           | $6.49 \times 10^{-4}$           | $6.82 \times 10^{-5}$               | 0.9806    |
|              | 4.2                                | 408.2        | $1.69 \times 10^{-2}$           | $7.76 \times 10^{-3}$           | $1.89 \times 10^{-3}$               | 0.9872    |
|              |                                    | 406.5        | $7.35 \times 10^{-3}$           | $3.77 \times 10^{-3}$           | $7.72 \times 10^{-4}$               | 0.9819    |
|              |                                    | 404.5        | $3.40 \times 10^{-3}$           | $1.75 \times 10^{-3}$           | $3.67 \times 10^{-4}$               | 0.9799    |
|              |                                    | 402.7        | $7.98 \times 10^{-4}$           | -----                           | -----                               | -----     |
|              | 7.5                                | 419.6        | $1.11 \times 10^{-2}$           | $9.79 \times 10^{-3}$           | $3.23 \times 10^{-3}$               | 0.9823    |
|              |                                    | 415.3        | $1.43 \times 10^{-3}$           | $2.47 \times 10^{-3}$           | $7.30 \times 10^{-4}$               | 0.9895    |
|              |                                    | 413.5        | $9.09 \times 10^{-4}$           | $9.95 \times 10^{-4}$           | $3.38 \times 10^{-4}$               | 0.9851    |

<sup>a</sup> Determination coefficient of the nonlinear least-squares analysis.

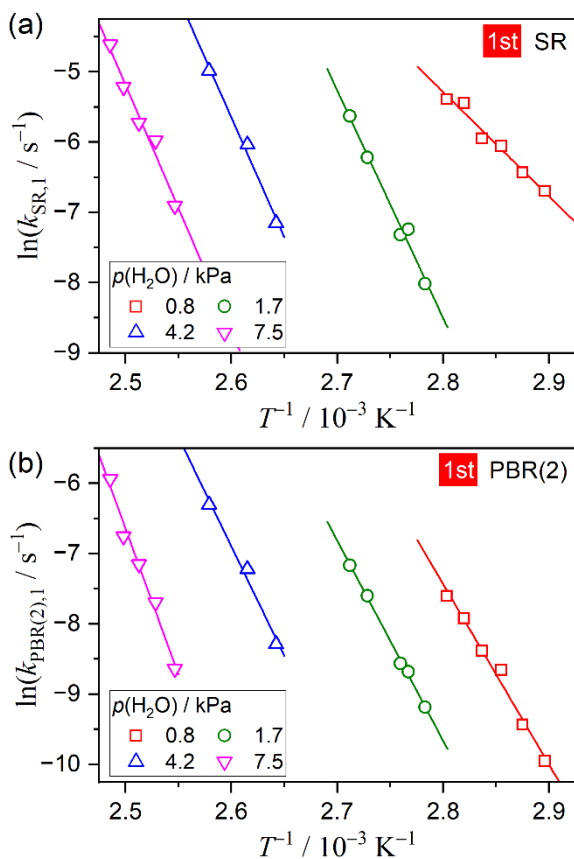

**Figure S16.** Arrhenius plots of the individual physico-geometrical reaction steps for the first reaction step of the two-step thermal dehydration process of CC-DH to form CC-AH via CC-MH (thermal dehydration of CC-DH to form CC-MH) at varying  $p(\text{H}_2\text{O})$  values: (a) SR and (b) PBR(2).

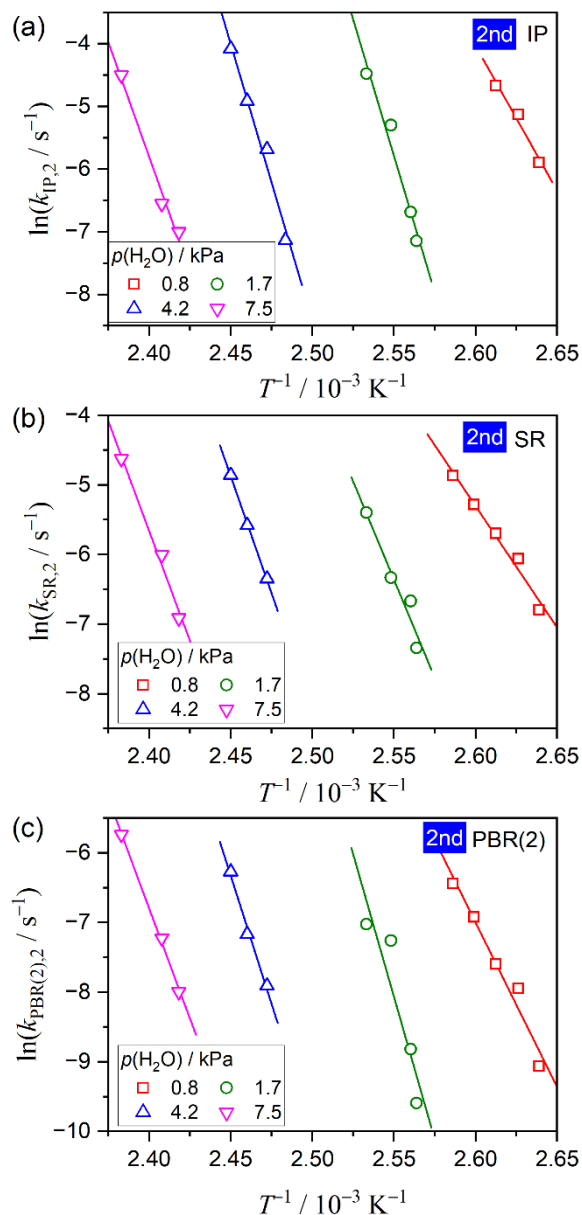

**Figure S17.** Arrhenius plots of the individual physico-geometrical reaction steps for the second reaction step of the two-step thermal dehydration process of CC-DH to form CC-AH via CC-MH (thermal dehydration of CC-MH to form CC-AH) at varying  $p(\text{H}_2\text{O})$  values: (a) IP, (b) SR, and (c) PBR(2).

**Table S4.** Apparent Arrhenius parameters of the component physico-geometrical processes involved in the two-step thermal dehydration process of CC-DH to form CC-AH via CC-MH at different  $p(\text{H}_2\text{O})$  values, as determined based on the SR–PBR(2) and IP–SR–PBR(2) models

| Reaction step $i$ | Process | $p(\text{H}_2\text{O})/\text{kPa}$ | $E_{a,i}/\text{kJ mol}^{-1}$ | $\ln(A_i/\text{s}^{-1})$ | $-\gamma^a$ |
|-------------------|---------|------------------------------------|------------------------------|--------------------------|-------------|
| 1                 | SR      | 0.8                                | $123.4 \pm 10.5$             | $36.3 \pm 3.6$           | 0.9858      |
|                   |         | 1.7                                | $269.3 \pm 20.1$             | $82.2 \pm 6.6$           | 0.9918      |
|                   |         | 4.1                                | $283.2 \pm 28.9$             | $82.9 \pm 9.1$           | 0.9948      |
|                   |         | 7.4                                | $291.7 \pm 26.9$             | $82.5 \pm 8.1$           | 0.9875      |
|                   | PBR(2)  | 0.8                                | $213.6 \pm 12.2$             | $64.5 \pm 4.2$           | 0.9935      |
|                   |         | 1.7                                | $236.8 \pm 5.9$              | $70.1 \pm 1.9$           | 0.9991      |
|                   |         | 4.1                                | $258.9 \pm 33.4$             | $74.1 \pm 10.5$          | 0.9918      |
|                   |         | 7.4                                | $345.2 \pm 25.9$             | $97.1 \pm 7.8$           | 0.9916      |
| 2                 | IP      | 0.8                                | $384.9 \pm 64.6$             | $116.3 \pm 20.4$         | 0.9862      |
|                   |         | 1.7                                | $724.9 \pm 96.4$             | $216.5 \pm 29.6$         | 0.9828      |
|                   |         | 4.2                                | $733.3 \pm 152.4$            | $227.0 \pm 45.3$         | 0.9890      |
|                   |         | 7.5                                | $607.9 \pm 73.2$             | $169.7 \pm 21.2$         | 0.9928      |
|                   | SR      | 0.8                                | $290.6 \pm 24.1$             | $85.6 \pm 7.6$           | 0.9898      |
|                   |         | 1.7                                | $469.3 \pm 84.9$             | $137.6 \pm 26.1$         | 0.9688      |
|                   |         | 4.2                                | $558.4 \pm 19.7$             | $159.7 \pm 5.8$          | 0.9994      |
|                   |         | 7.5                                | $525.0 \pm 60.7$             | $145.9 \pm 17.5$         | 0.9934      |
|                   | PBR(2)  | 0.8                                | $393.3 \pm 43.4$             | $116.0 \pm 13.6$         | 0.9822      |
|                   |         | 1.7                                | $681.3 \pm 205.4$            | $200.9 \pm 63.0$         | 0.9199      |
|                   |         | 4.2                                | $611.7 \pm 65.2$             | $173.9 \pm 19.3$         | 0.9944      |
|                   |         | 7.5                                | $526.0 \pm 27.7$             | $145.1 \pm 8.0$          | 0.9986      |

<sup>a</sup> Correlation coefficient of the linear regression analysis for the Arrhenius plot.

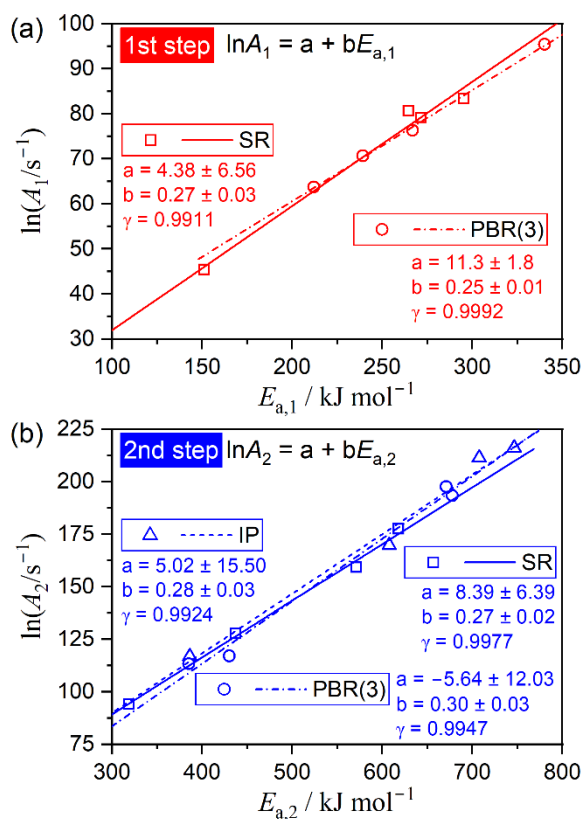

**Figure S18.** Apparent linear correlations observed between  $\ln A_i$  and  $E_{a,i}$  values determined for the individual physico-geometrical reaction processes of the first and second reaction steps of the thermal dehydration process of CC-DH to form CC-AH via CC-MH based on SR–PBR(3) and IP–SR–PBR(3) models, respectively: (a) first and (b) second reaction steps.
